# Supplementary material
Source: publisher figshare collection journal article supplement (https://springernature.figshare.com/ndownloader/files/17030147)
Supplement: Supplementary file 1 [file 17030147]

**Additional file 2**

**Underground transfer of carbonised organic residues to lithics during fire experiments: implications for archaeology**

**Lyn Wadley, Susan Luong, Christine Sievers, Linda Prinsloo**

**Gas chromatography mass spectrometry (GC-MS)**

*GC-MS Methods*

Two sets of samples were prepared. One set was analysed with GC-MS directly after extraction and the second set was derivatised after extraction, prior to GC-MS analysis. The purpose of having two sets is because some organic compounds require derivatisation (chemical modification of the molecules) so they can be detected by the instrument. Compounds that do not need to be derivatised should technically still be observed in the derivatised samples. However, a separate ‘non-derivatised’ set was prepared in case some these molecules are susceptible to degradation under the harsh conditions required for derivatisation.

Sedge samples were ground up using a spice grinder, placed into screw cap vials and extracted using chloroform/methanol (3:1 v/v) solvent. The extraction was aided by sonication. The same extraction procedure was used for scrapings of the black residue on the stone, and scrapings of the quartz stone on the same and opposite sides relative to the black residue. A chunk of burnt bone was powdered and also extracted in the same manner. The supernatant for each sample was filtered through a 0.22 μm hydrophobic syringe filter unit. For direct analysis, an aliquot of each sample was transferred into a 1.5 mL vial, capped and directly analysed by GC-MS. A solvent blank (containing the extraction solvent) was also prepared and analysed with GC-MS. To prepare derivatised samples, aliquots of each sample, as well as a solvent blank and reagent blank (containing the derivatising reagents) were dried down under a gentle stream of nitrogen and reconstituted in N-Methyl-N-trimethylsilyltrifluoroacetamide (MSTFA, 40 µL) and acetonitrile (10 µL). The samples were incubated at 70°C for one hour and analysed by GC-MS.

An Agilent Technologies 7890 GC system coupled with a 7000 GC/MS triple quadrupole mass spectrometer was used to analyse the samples. Chromatographic separation was carried out using an Rxi®-5Sil MS 1,4-bis(dimethylsiloxy)phenylene dimethyl polysiloxane fused silica column (20 m × 0.18 mm × 0.18 µm). All samples were analysed in duplicate, in scan mode, with a scanning mass range of *m/z* 50–1000.

*GC-MS results*

After extraction, the filtration step removed all the black particulates suspended in the black residue, charred sedge and bone samples; the bulk of these samples appeared to be carbon (FTIR and Raman results). The quartz rock scrapings were mostly insoluble in the extraction solvent and appeared as white specks, as expected. All the filtered solutions were clear and homogeneous, and contained organic compounds in abundances not possible to detect by FTIR spectroscopy.

*GC-MS non-derivatised samples*

Each sample was analysed twice and the data obtained were consistent in both runs. Fig. S1A is an overlay of total ion chromatograms (TICs) of dried sedge and black residue. The six compounds marked with arrows are prominently found in both the black residue sample and the dried sedge sample. This is confirmed with the mass spectral data, which show that all six compounds share the same fragmentation pattern and similar relative abundance of MS peaks (Fig. S1A). In the 7-9.5 minute range, both TICs have similar shape and combined MS spectra. However, many compounds eluting after 9.5 minutes in the dried sedge sample are missing in the black residue sample. These compounds of interest were not found in the solvent blank.

Overlay of the charred sedge and black residue chromatograms (Fig. S1B) shows that they share a chemical signature, however there are several peaks found in the charred sedge sample that are not found in the black residue sample. The six prominent compounds found in the black residue and dried sedge samples were also observed in the charred sedge sample (based on corresponding GC retention times and MS data). In addition, there is a major compound eluting at 12.8 minutes (compound 7) in the charred sedge sample. It is also a major compound in the dried sedge sample, but found in the black residue sample in a much lower abundance.

Comparison of the burnt bone (blue line) and black residue (black line) samples in Fig. S1C show that they are also very similar. However, there is one prominent compound found in the bone sample (compound 8, eluting at 5.4 minutes) that is not found in the black residue solvent blank and charred sedge samples. Oddly enough, it was found in the dried sedge sample. This result is confirmed by the MS data in Fig. S1D.


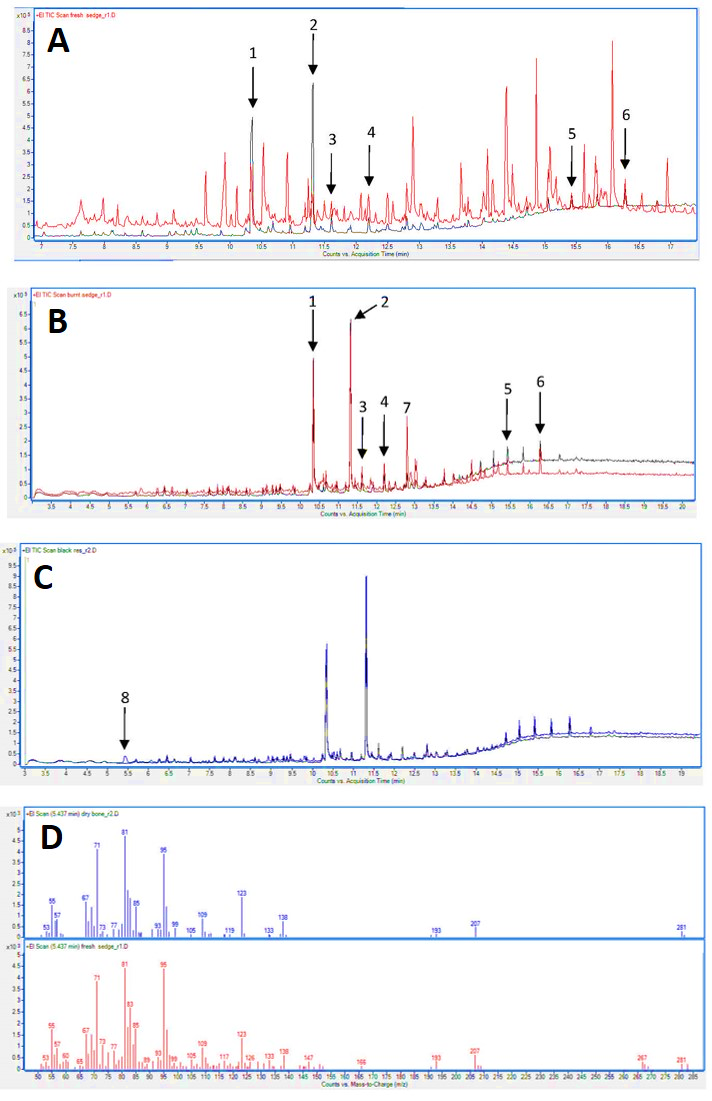


**Fig. S1.** A) Overlay of dried sedge and black residue total ion chromatograms (TIC) Red line = dried sedge, black line = black residue. B) Overlay of the charred sedge (brown line) and black residue (black line) TIC. C) Overlay of the bone (blue line) and black residue (black line) TIC. D) MS data of bone (blue) and dried sedge (red).

|  |
| --- |
|  |

Overlays of the black residue, burnt bone, fresh sedge and burnt sedge show that several of the derivatised compounds are common in all four samples and MS data support this (Fig. S1 B and C). TIC of dry bone, burnt sedge and the quartz rock on both sides show that essentially the same compounds are present in all the samples (Fig. S1D).

**
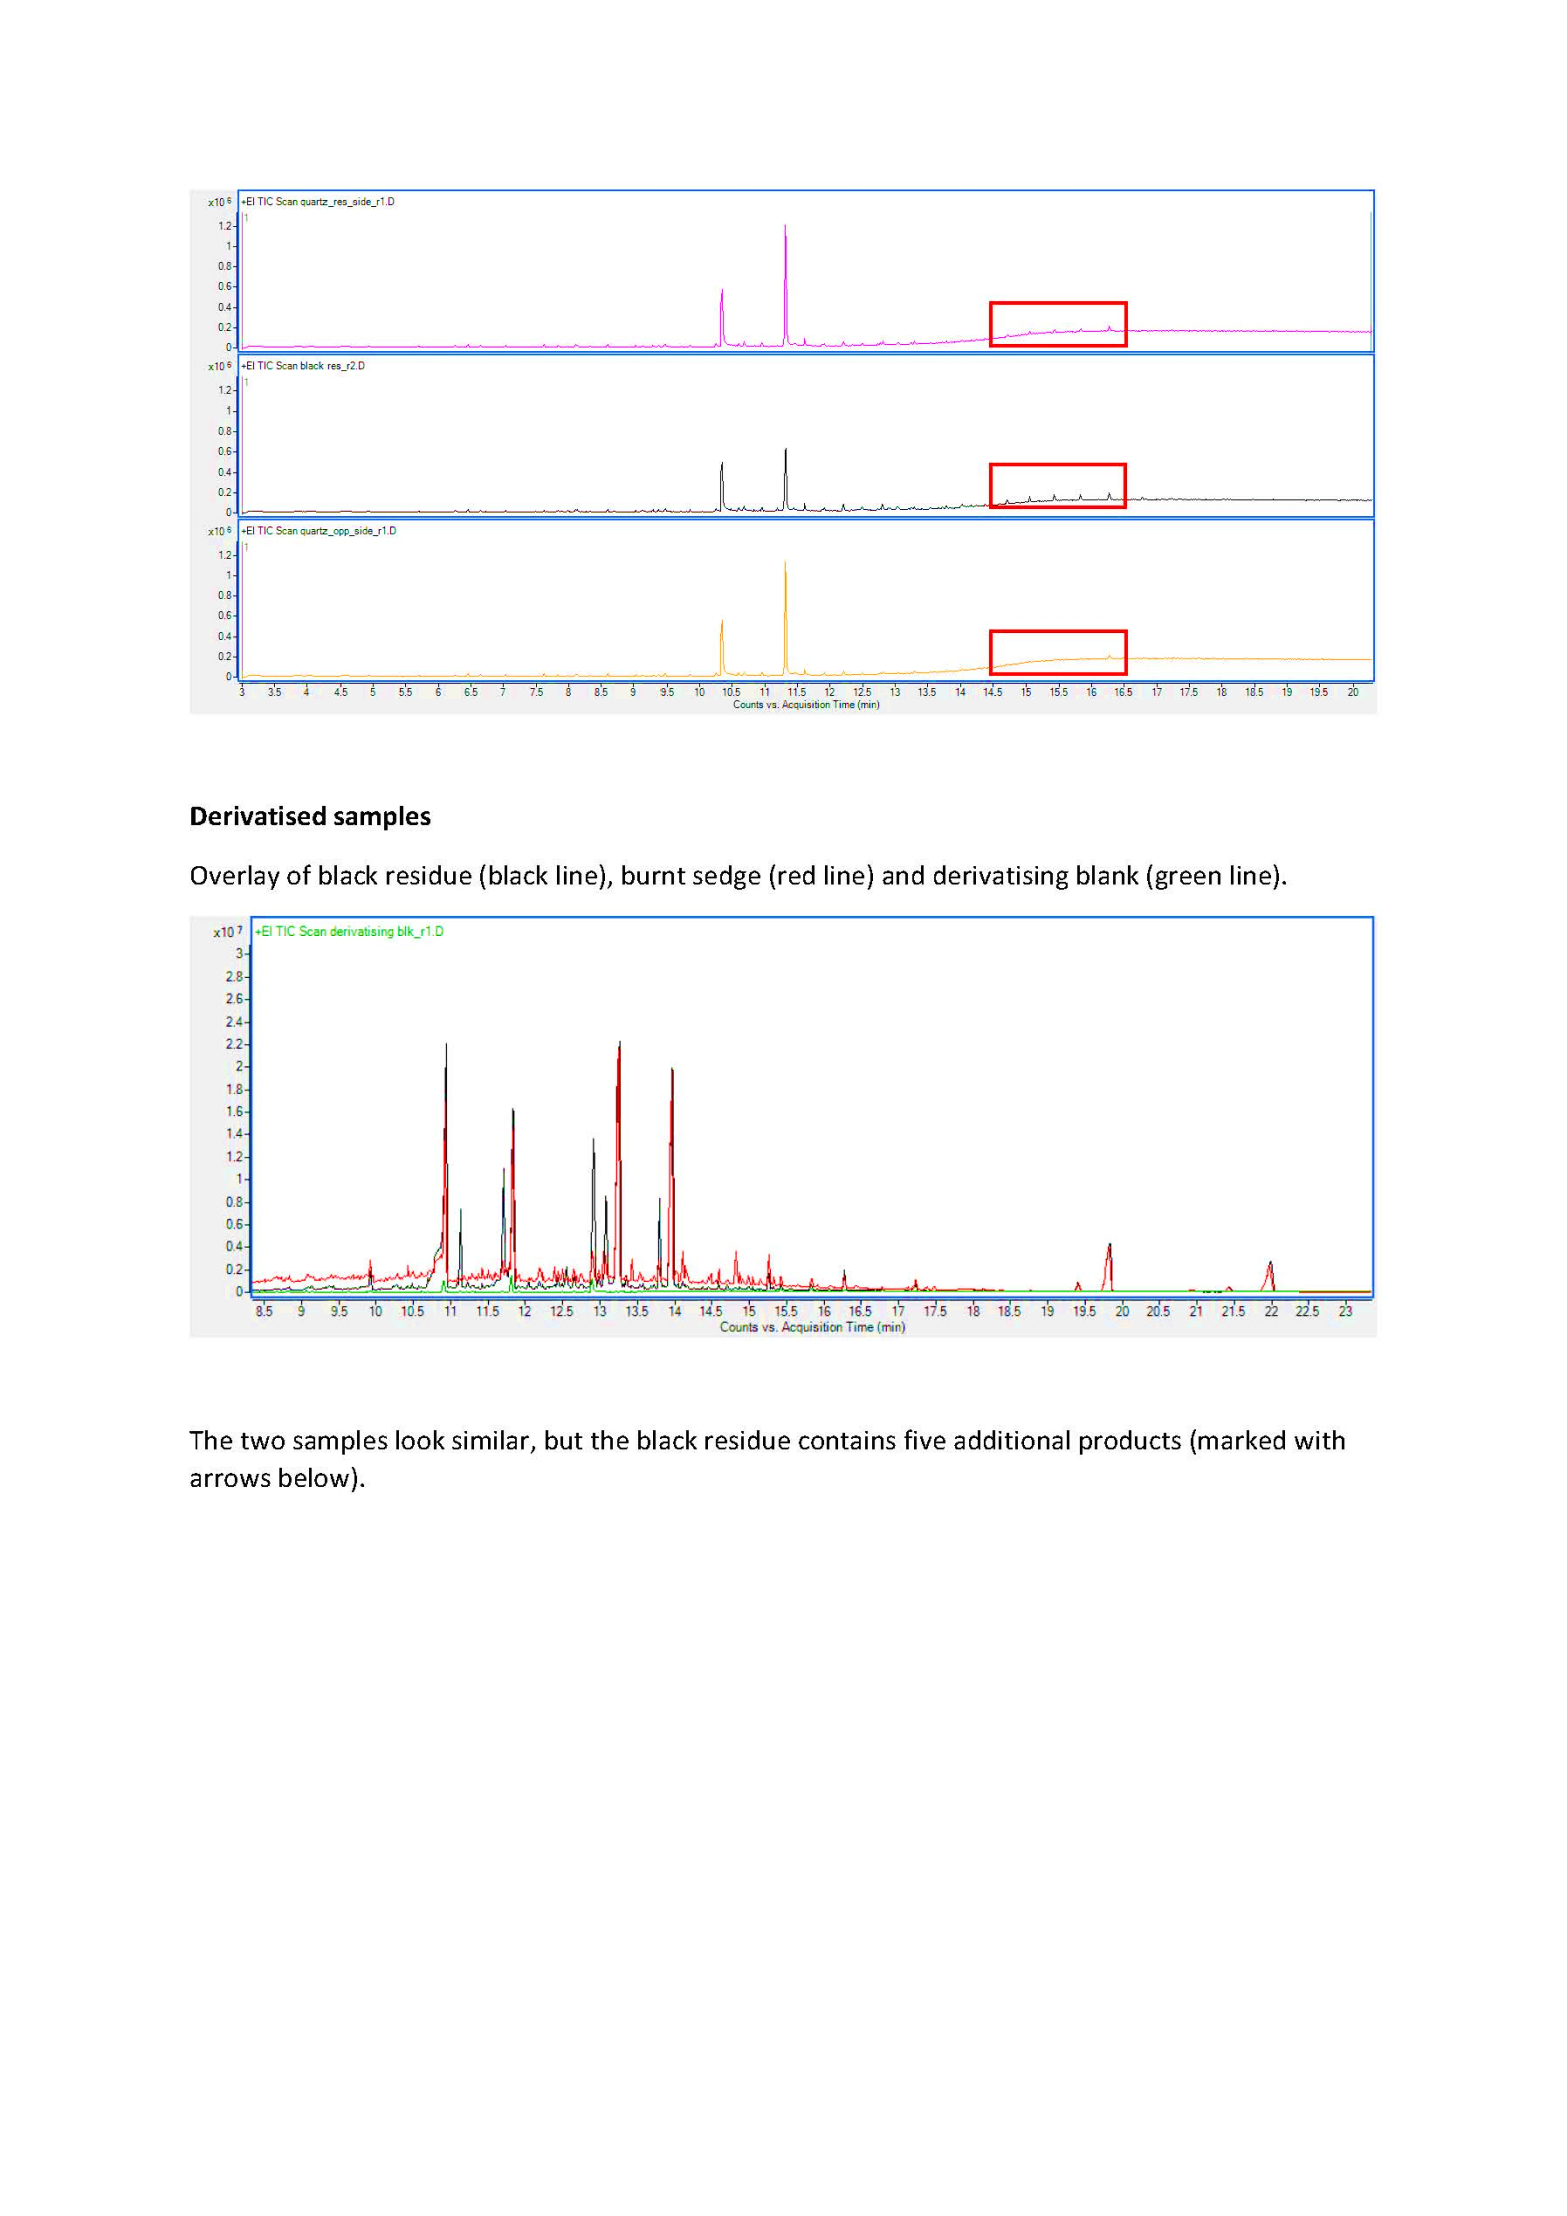
**

**Fig. S2.** Total ion chromatograms (TIC) of scrapings from the quartz rock on the same side (pink line)(top) and opposite side (orange line) (bottom) to the black residue (black line) (centre). Chromatograms presented on the same y-axis scale.

Comparison of the TICs of scrapings from the quartz rock on the same side (pink line Fig. S2) and opposite side (orange line Fig. S2) to the black residue (black line Fig. S2) shows that compounds 1 and 2 are the predominant analytes. The compounds eluting between 14.5 and 16.5 minutes are present in the highest abundance in the black residue. These compounds are found at a relatively lower abundance on the rock surface adjacent to the residue, and at significantly lower abundance (with some peaks not observed) on the opposite side of the rock.

*GC-MS derivatised samples*

Fig. S3A is an overlay of the TIC chromatograms of the derivatised products of the black residue and the charred sedge. The two samples look similar, but the black residue contains five additional products (marked with arrows in Fig. S3B). Overlays of the black residue, burnt bone, fresh sedge and burnt sedge show that several of the derivatised compounds are common in all four samples and MS data support this. TIC of dry bone, burnt sedge and the quartz rock on both sides show that essentially the same compounds are present in all the samples (Fig. S4A,B,C,D).

| **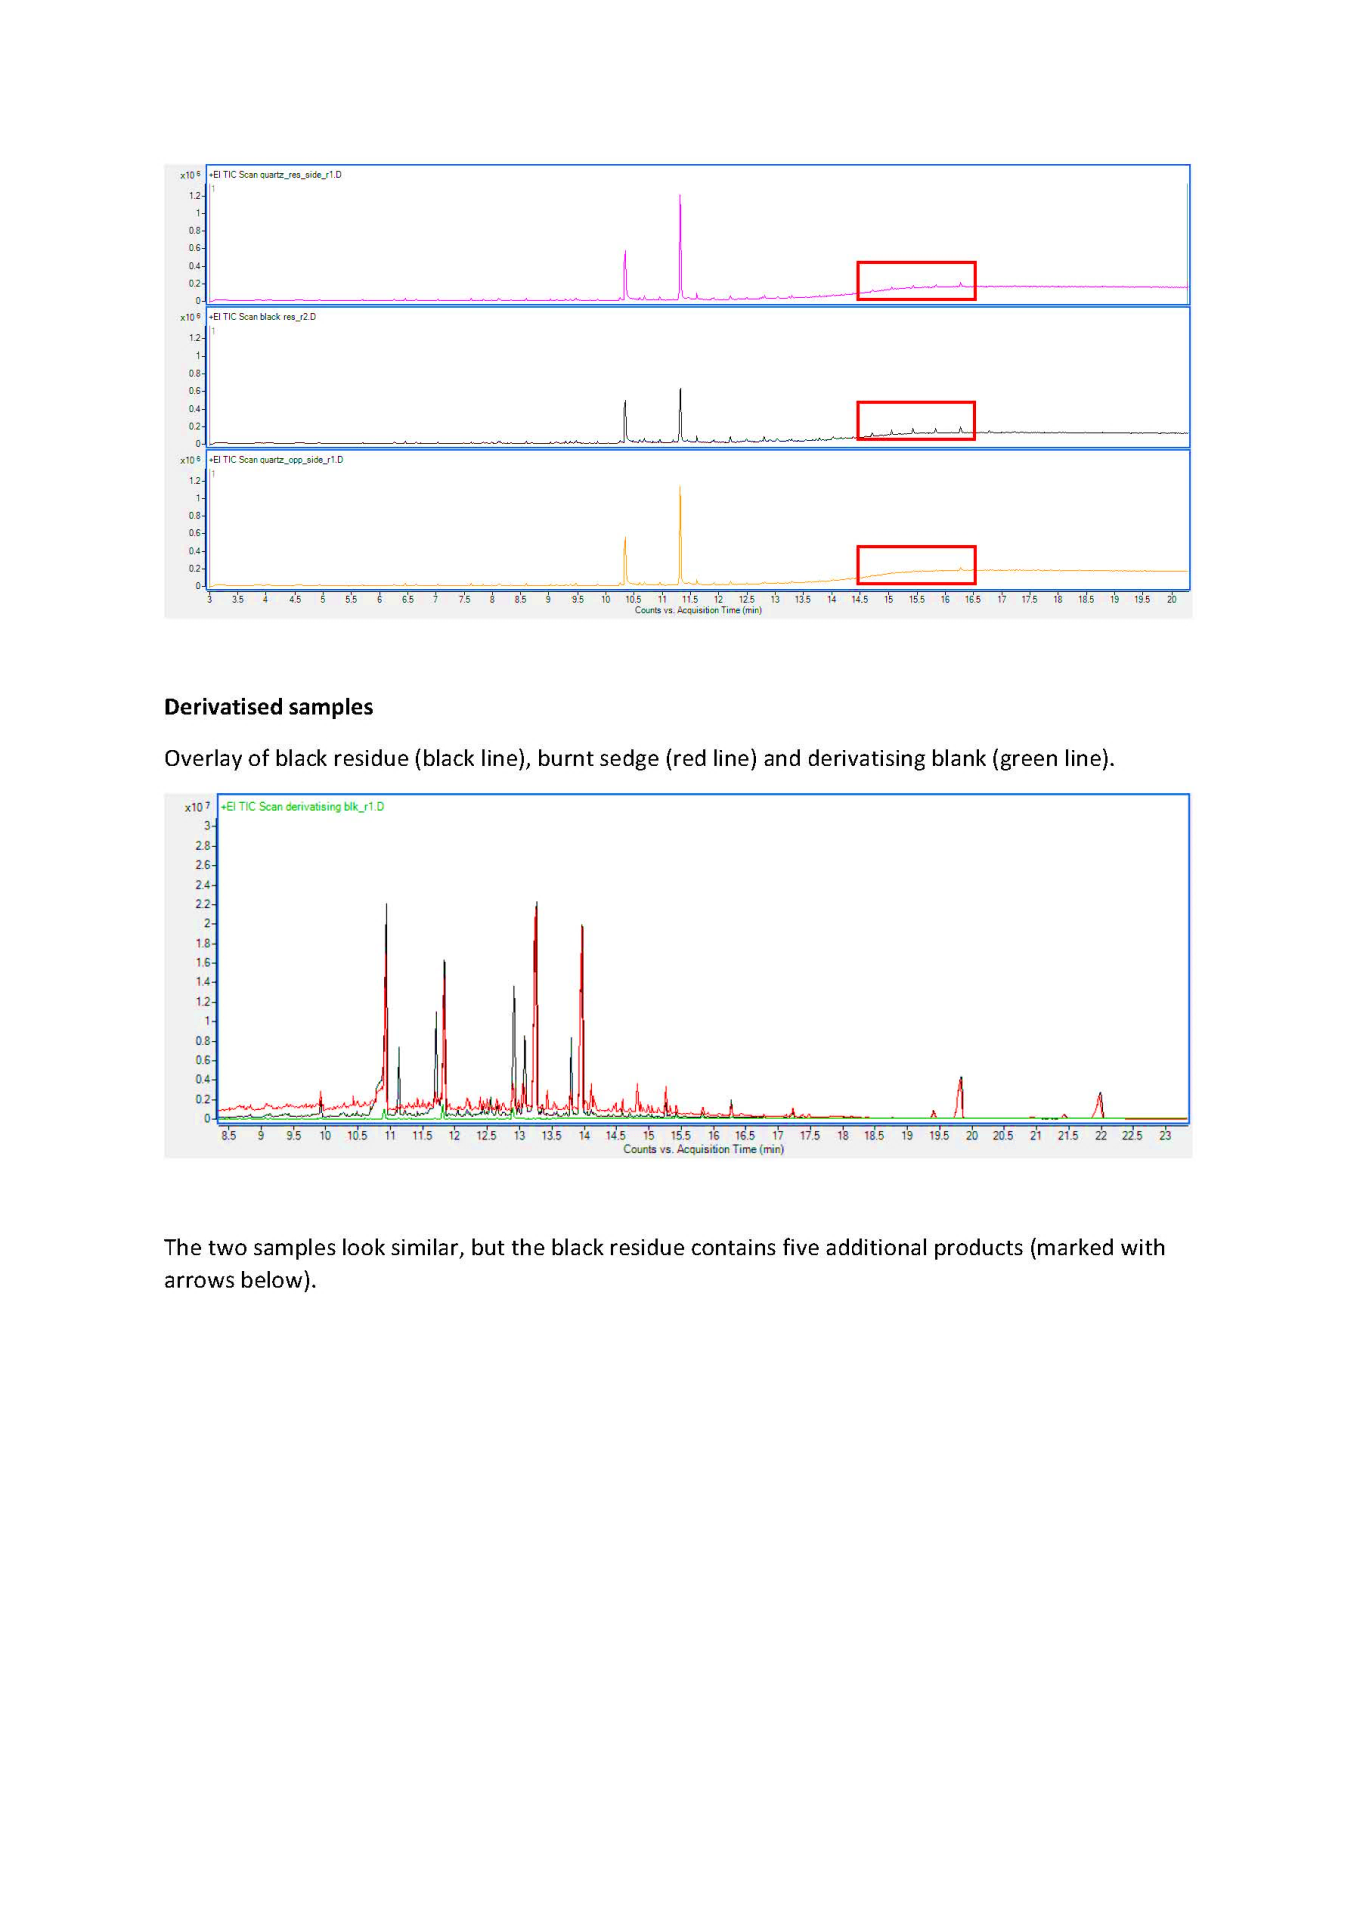**  **A**  Charred sedge (red)  Black residue (black) |
| --- |
| **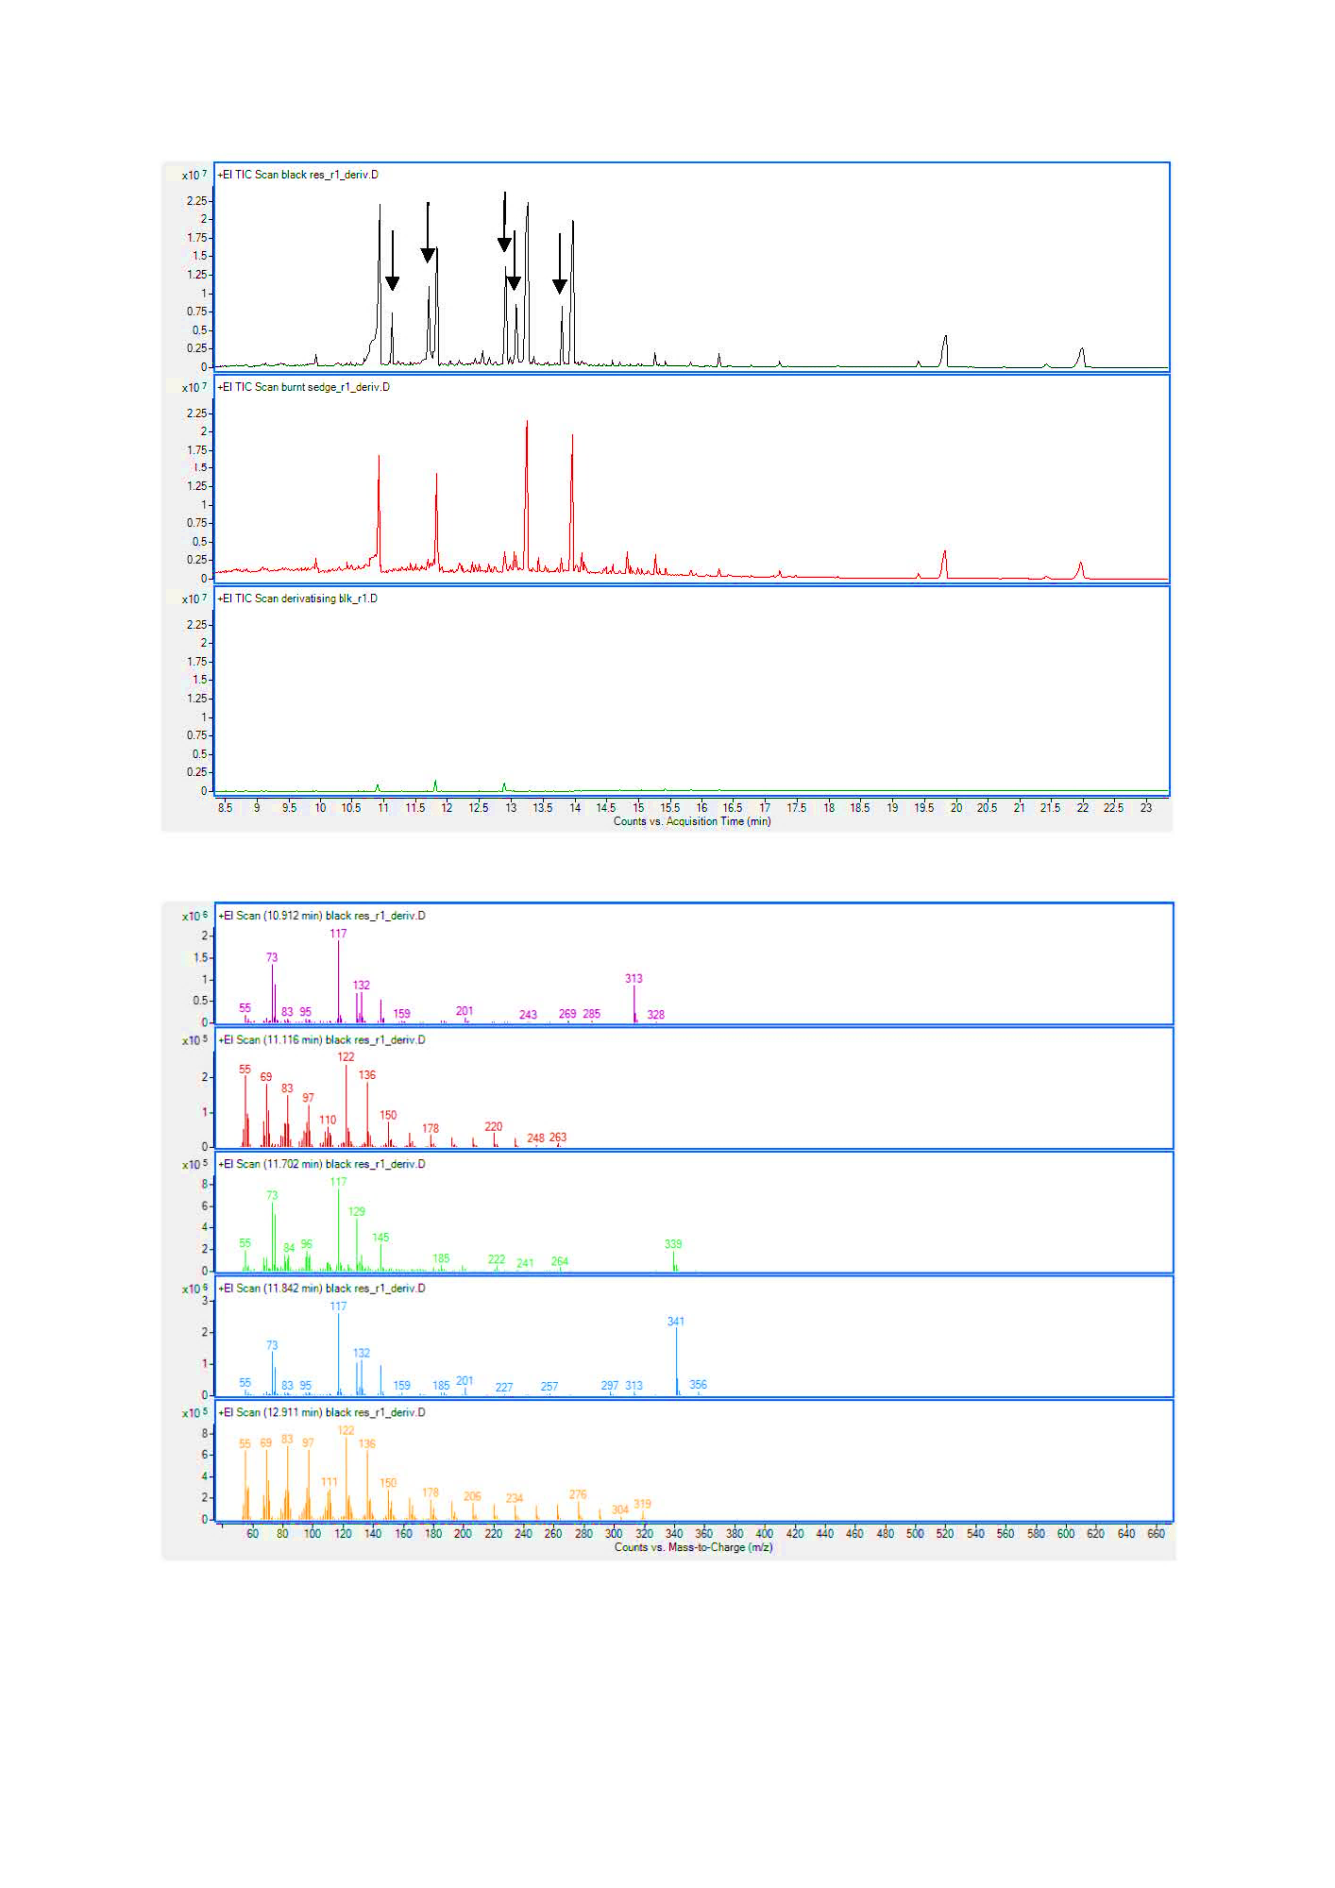**  **B** |

**Fig. S3.** A)An overlay of the TIC chromatograms of the derivatised products of the black residue and the charred sedge B). The separated chromatograms with five additional peaks indicated in the chromatogram of the black residue.

**A.** Mass spectroscopic data for the 6 common compounds eluting after 9.5 minutes in the fresh sedge and black residue samples. (Note that m/z 207 is a column contaminant.)

*Compound 1 (black residue MS is above (black) and the fresh sedge is below (red)):*

*Compound 2 (black residue MS is above (black) and the fresh sedge is below (red)):*

*Compound 3 (black residue MS is above (black) and the fresh sedge is below (red)):*

*Compound 4 (black residue MS is above (black) and the fresh sedge is below (red)):*

*Compound 5 (black residue MS is above (black) and the fresh sedge is below (red)):*

*Compound 6 (black residue MS is above (black) and the fresh sedge is below (red)):*

**B.** Mass spectroscopic data of the derivatised compounds in the black residue


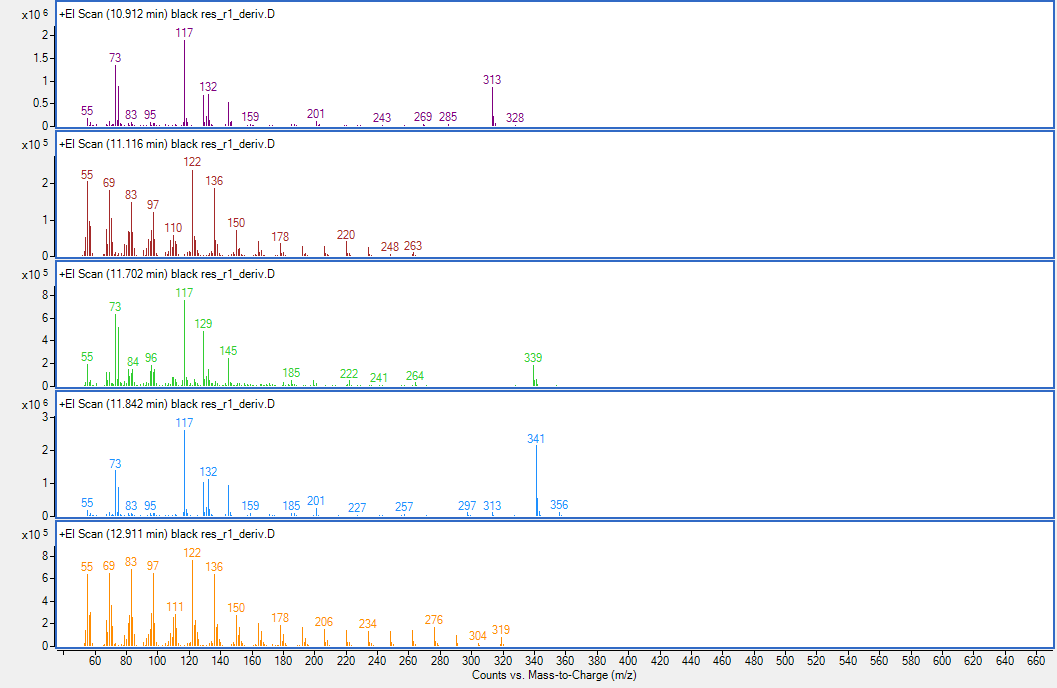


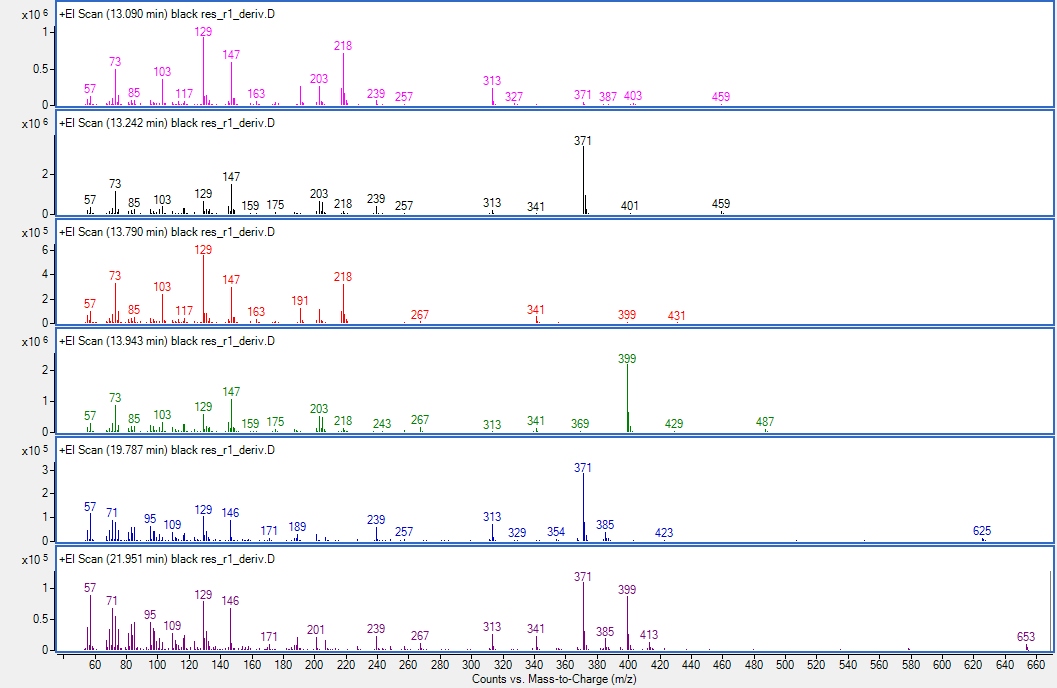


**C.** Overlay of the black residue, dry bone, fresh sedge and burnt sedge shows that several compounds are common in all four samples. MS data support this.


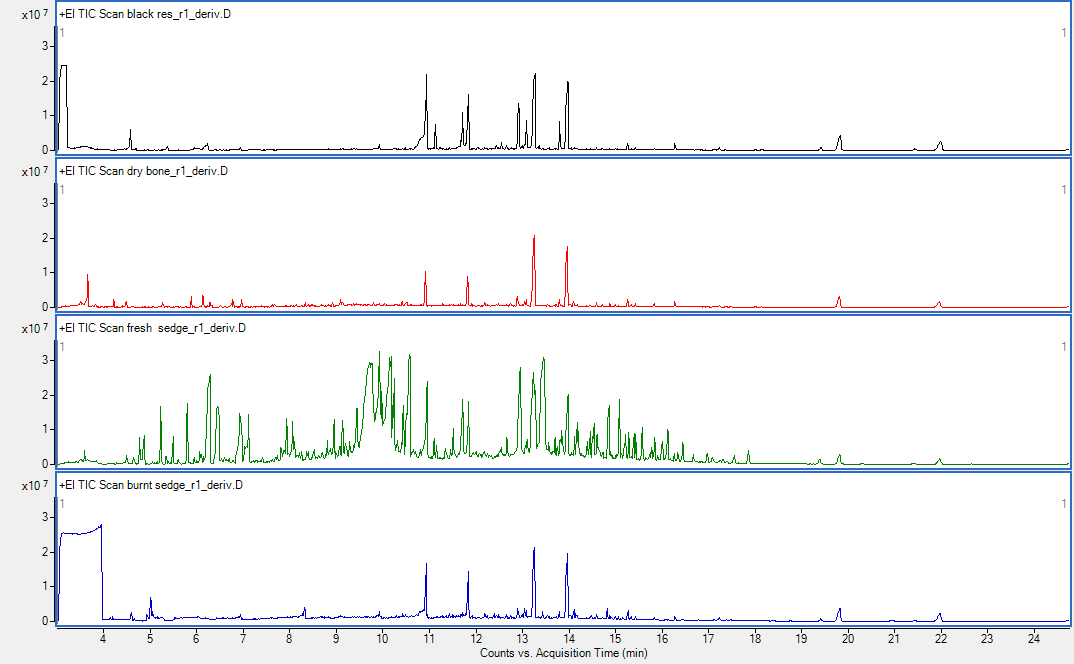


**D.** TIC of dry bone, burnt sedge and the quartz rock on both sides show that they have essentially the same compounds present in the samples.


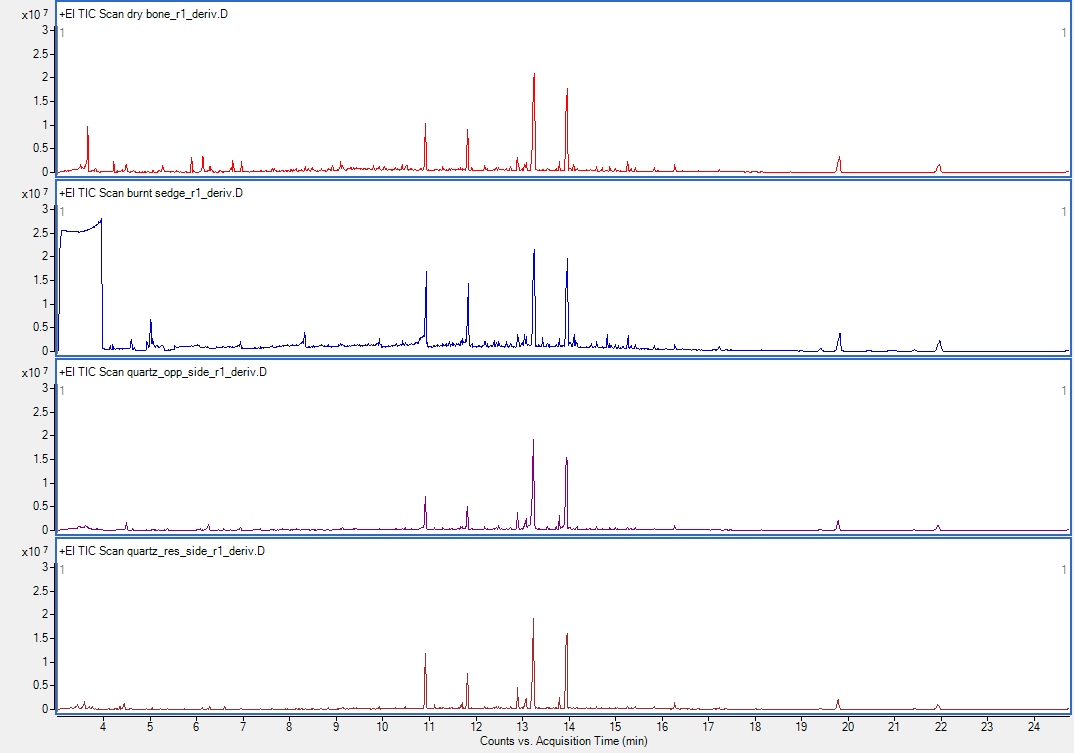


**Fig. S4.** TIC of dry bone, burnt sedge and the quartz rock on both sides. A)Mass spectroscopic data for the 6 common compounds eluting after 9.5 minutes in the fresh sedge and black residue samples. (Note that m/z 207 is a column contaminant.); B)Mass spectroscopic data of the derivatised compounds in the black residue; C)Overlay of the black residue, dry bone, fresh sedge and burnt sedge shows that several compounds are common in all four samples; D)TIC of dry bone, burnt sedge and the quartz rock on both sides show that they have essentially the same compounds present in the samples.

It appears that the fire caused the majority of the compounds found in sedge to be degraded. The remaining compounds that were relatively resistant to heat were dispersed, explaining why they were also found on the bone and rock samples.

GC-MS measurements of the samples revealed that the black residue and burnt bone share eight compounds with dried sedges and that several of the derivatised compounds are also common to all samples. These results suggest that the residues have derived from the heated sedges. The same compounds condensed on the uppermost lithic surfaces in small quantities that were not visible to the naked eye, but could be detected by GC-MS. The compounds were not precisely identified; such determinations are outside the scope of this project.
